# Supplementary material
Source: PubMed Central journal article supplement (PMC3697974)
Supplement: 1c01501a666215d4afb7f0769bb7ce73_genetics.113.152561-15.pdf [file 1c01501a666215d4afb7f0769bb7ce73_genetics.113.152561-15.pdf]

**Table S1** Origins of primer sequences for molecular markers genotyped for Sp x Stu cross. Marker types and locus in *A. thaliana* are indicated to all markers.

| Chromosome | Locus name | Marker type        | Locus or BAC in <i>A. thaliana</i> | Origin of primer sequences     | Forward primer        | Reverse primer        |
|------------|------------|--------------------|------------------------------------|--------------------------------|-----------------------|-----------------------|
| AL1        | F20D22     | Microsat           | AT1G04120                          | Clauss <i>et al.</i> 2002      |                       |                       |
| AL1        | CRY2       | SNP                | AT1G04400                          | Kuittinen <i>et al.</i> 2004   |                       |                       |
| AL1        | PHYA       | SNP                | AT1G09570                          | Kuittinen <i>et al.</i> 2004   |                       |                       |
| AL1        | ICE13      | Microsat           | AT1G13220                          | Clauss <i>et al.</i> 2002      |                       |                       |
| AL1        | GI         | SNP                | AT1G22770                          | Kuittinen <i>et al.</i> 2004   |                       |                       |
| AL1        | AthZFPG    | Microsat           | AT1G24625                          | Clauss <i>et al.</i> 2002      |                       |                       |
| AL1        | ATTSO392   | Microsat           | AT1G30630                          | Clauss <i>et al.</i> 2002      |                       |                       |
| AL1        | AT1G31930  | SNP                | AT1G31930                          | Ross-Ibarra <i>et al.</i> 2008 |                       |                       |
| AL1        | AT1G36310  | SNP                | AT1G36310                          | Hansson <i>et al.</i> 2006     |                       |                       |
| AL1        | RHL1       | CAPS/ <i>Sma</i> I | AT1G48380                          | Kuittinen <i>et al.</i> 2004   |                       |                       |
| AL1        | LAS        | SNP                | AT1G55580                          | Leppälä & Savolainen 2011      |                       |                       |
| AL1        | nga280     | Microsat           | AT1G55840                          | Clauss <i>et al.</i> 2002      |                       |                       |
| AL2        | AT1G64610  | SNP                | AT1G64610                          | Hansson <i>et al.</i> 2006     |                       |                       |
| AL2        | AT1G62520  | SNP                | AT1G62520                          | Hansson <i>et al.</i> 2006     |                       |                       |
| AL2        | F19K23     | Microsat           | AT1G62050                          | Clauss <i>et al.</i> 2002      |                       |                       |
| AL2        | T15M6      | Microsat           | AT1G58180                          | Leppälä & Savolainen 2011      |                       |                       |
| AL2        | FT         | SNP                | AT1G65480                          | Kuittinen <i>et al.</i> 2004   |                       |                       |
| AL2        | FKF1       | SNP                | AT1G68050                          | A. Niittyvuopio                |                       |                       |
| AL2        | AT1G74600  | SNP                | AT1G74600                          | Ross-Ibarra <i>et al.</i> 2008 |                       |                       |
| AL3        | SPY        | SNP                | AT3G11540                          | Kuittinen <i>et al.</i> 2004   |                       |                       |
| AL3        | BRC1       | SNP                | AT3G18550                          |                                | ATTGCTCCCTTTTAGCCCTTC | TCTCTCGTCCTTGACAACCTC |
| AL3        | DMC1       | SNP                | AT3G22880                          | Kuittinen <i>et al.</i> 2004   |                       |                       |
| AL3        | ELF8       | SNP                | AT2G06210                          |                                | GCTGCTAATGATGCGACTGAT | ACTTCCACTTGACGCTTCTTG |
| AL3        | AGT        | SNP                | AT2G16870                          | Leppälä & Savolainen 2011      |                       |                       |
| AL3        | PHYB       | SNP                | AT2G18790                          | Kuittinen <i>et al.</i> 2004   |                       |                       |
| AL3        | ICE14      | Microsat           | AT2G20310                          | Clauss <i>et al.</i> 2002      |                       |                       |
| AL4        | AT2G23170  | SNP                | AT2G23170                          | Ross-Ibarra <i>et al.</i> 2008 |                       |                       |
| AL4        | ELF3       | SNP                | AT2G25930                          | Kuittinen <i>et al.</i> 2004   |                       |                       |

| Chromosome | Locus name | Marker type         | Locus or BAC in <i>A. thaliana</i> | Origin of primer sequences | Forward primer                         | Reverse primer          |
|------------|------------|---------------------|------------------------------------|----------------------------|----------------------------------------|-------------------------|
| AL4        | ATEX6      | SNP                 | AT2G28950                          | Kuittinen et al. 2004      |                                        |                         |
| AL4        | TTG2       | SNP                 | AT2G37260                          | Leppälä & Savolainen 2011  |                                        |                         |
| AL4        | CCA1       | SNP                 | AT2G46830                          | A. Niittyvuopio            |                                        |                         |
| AL4        | MSAT2.22   | Microsat            | AT2G47960                          | Loudet et al. 2002         |                                        |                         |
| AL5        | RNS1       | SNP                 | AT2G02990                          | Kuittinen et al. 2004      |                                        |                         |
| AL5        | GL1_A95D   | SNP                 | AT3G27920                          | Kivimäki et al. 2007       |                                        |                         |
| AL5        | CK2alpha3  | dCAPS/ <i>VspI</i>  | AT3G50000                          |                            | GGAAGCCTTGGTCCAAATTCAT <del>I</del> AA | CACATGTTGAGTTATGTTACGTG |
| AL5        | AT3G54720  | SNP                 | AT3G54720                          | Ross-Ibarra et al. 2008    |                                        |                         |
| AL5        | T10K17     | Microsat            | T10K17                             |                            | CAAAGTTGGTGGTAGTGG                     | CACGCAAATTACAATCTCTG    |
| AL5        | F2809      | Microsat            | AT3G57320                          | Leppälä & Savolainen 2011  |                                        |                         |
| AL5        | nga112     | Microsat            | AT3G62650                          | Clauss et al. 2002         |                                        |                         |
| AL5        | APG1       | SNP                 | AT3G63410                          |                            | TTACCTTCCCAAGGGTTTAG                   | AGCTGCTAGAGTTCCCAGGAG   |
| AL6        | FLC        | SNP                 | AT5G10140                          | A. Niittyvuopio            |                                        |                         |
| AL6        | nga151     | Microsat            | AT5G14480                          | Bell & Ecker 1994          |                                        |                         |
| AL6        | CO         | SNP                 | AT5G15840                          | Kuittinen et al. 2004      |                                        |                         |
| AL6        | nga106     | Microsat            | AT5G16520                          | Bell & Ecker 1994          |                                        |                         |
| AL6        | AthCDPK9   | Microsat            | MQM1                               | Clauss et al. 2002         |                                        |                         |
| AL6        | CLC-D      | SNP                 | AT5G26240                          | Kuittinen et al. 2004      |                                        |                         |
| AL6        | CRY1       | CAPS/ <i>Bam</i> HI | AT4G08920                          | Kuittinen et al. 2004      |                                        |                         |
| AL6        | AT4G04350  | SNP                 | AT4G04350                          | Ross-Ibarra et al. 2008    |                                        |                         |
| AL6        | AT4G00030  | SNP                 | AT4G00030                          | Ross-Ibarra et al. 2008    |                                        |                         |
| AL7        | AP2        | SNP                 | AT4G36920                          | Kuittinen et al. 2004      |                                        |                         |
| AL7        | AT4G28395  | SNP                 | AT4G28395                          | Ponce et al. 1999          |                                        |                         |
| AL7        | MS5        | SNP                 | AT4G20900                          | Leppälä & Savolainen 2011  |                                        |                         |
| AL7        | T16H5      | Microsat            | T16H5                              |                            | TGGCAGTACCTATCTATCGTA                  | CGGAATTAGGGATTTCAGA     |
| AL7        | FCA        | SNP                 | AT4G16280                          | Kuittinen et al. 2004      |                                        |                         |
| AL7        | HCF109     | SNP                 | AT5G36170                          |                            | AGAGCTTCTGCTGGTTGGAG                   | TCGCCAGTTGACTTCTCTCT    |
| AL7        | ATTSO191   | Microsat            | AT5G37780                          | Clauss et al. 2002         |                                        |                         |
| AL7        | ICE9       | Microsat            | AT5G40340                          | Clauss et al. 2002         |                                        |                         |
| AL8        | MJB21      | Microsat            | MJB21                              |                            | AAAGTAAGCCAAGCGTCAT                    | AACTAACAAAAGCGGAGAAG    |

| Chromosome | Locus name | Marker type | Locus or BAC in <i>A. thaliana</i> | Origin of primer sequences | Forward primer | Reverse primer |
|------------|------------|-------------|------------------------------------|----------------------------|----------------|----------------|
| AL8        | AT5G48100  | SNP         | AT5G48100                          | Ross-Ibarra et al. 2008    |                |                |
| AL8        | FRI        | SNP & indel | AT4G00650                          | Kuittinen et al. 2004      |                |                |
| AL8        | AT5G53020  | SNP         | AT5G53020                          | Ross-Ibarra et al. 2008    |                |                |
| AL8        | ZTL        | SNP         | AT5G57360                          | A. Niittyvuopio            |                |                |
| AL8        | TOC1       | SNP         | AT5G61380                          | A. Niittyvuopio            |                |                |
| AL8        | MHJ24      | Microsat    | MHJ24                              | Clauss et al. 2002         |                |                |
| AL8        | FRO1       | SNP         | AT5G67590                          | Leppälä & Savolainen 2011  |                |                |
