# Supplementary material
Source: PubMed Central journal article supplement (PMC3697974)
Supplement: 3a1b02457426959af9f9712b1ddcbe37_genetics.113.152561-9.pdf [file 3a1b02457426959af9f9712b1ddcbe37_genetics.113.152561-9.pdf]

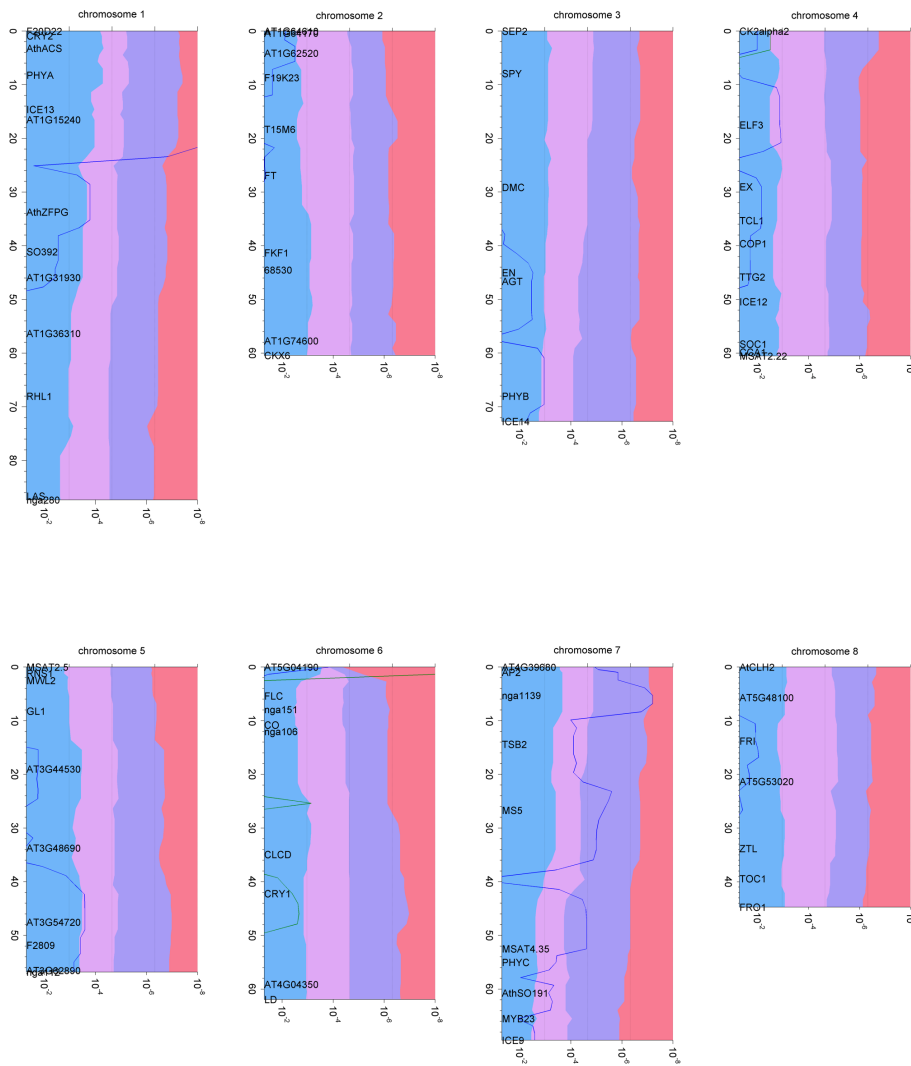

**Figure S2** Single-locus TRD analyses for SpMaF<sub>2</sub>. The  $p$ -value of the likelihood ratio tests are on the horizontal axes and genetic distances in cM on the y-axis. The blue line indicates gametic vs. null, and the green line indicates zygotic vs. null. The frequencies of the four F<sub>2</sub> genotypes are shown in different colours; from left to right: Sp homozygote (Sp1Sp2, blue), Sp1Ma2, Ma1Sp2, and Ma homozygote (Ma1Ma2, red).
