# Supplementary material
Source: PubMed Central journal article supplement (PMC3697974)
Supplement: 7bd011347bea1b1fd0cf2e28dd5b2ab4_genetics.113.152561-6.pdf [file 7bd011347bea1b1fd0cf2e28dd5b2ab4_genetics.113.152561-6.pdf]

**Table S2** Zygotic two-locus interaction between AL1 and AL6 in Sp x Stu cross. Observed and expected (in parentheses) two locus genotype counts.

|                               | Sp cytoplasm           |         |         |          | Stu cytoplasm          |          |         |          |         |         |
|-------------------------------|------------------------|---------|---------|----------|------------------------|----------|---------|----------|---------|---------|
|                               | AL6, AT4G04350 (56 cM) |         |         |          | AL6, AT4G04350 (56 cM) |          |         |          |         |         |
|                               | Sp1Sp2                 | Sp1Stu2 | Sp2Stu1 | Stu1Stu2 | Sp1Sp2                 | Sp1Stu2  | Sp2Stu1 | Stu1Stu2 |         |         |
| <b>AL1, F20D22 (0 cM)</b>     | Sp1Sp2                 | 14 (13) | 13 (16) | 17 (16)  | 11 (9)                 | Sp1Sp2   | 16 (12) | 13 (14)  | 10 (16) | 10 (13) |
|                               | Sp1Stu2                | 13 (9)  | 10 (10) | 9 (11)   | 4 (6)                  | Sp1Stu2  | 12 (8)  | 7 (9)    | 17 (10) | 9 (8)   |
|                               | Sp2Stu1                | 15 (12) | 14 (15) | 13 (15)  | 8 (8)                  | Sp2Stu1  | 13 (11) | 13 (13)  | 17 (14) | 9 (12)  |
|                               | Stu1Stu2               | 4 (12)  | 18 (14) | 17 (14)  | 9 (8)                  | Stu1Stu2 | 0 (10)  | 16 (12)  | 10 (14) | 16 (11) |
| <b>AL1, AT1G31930 (47 cM)</b> | Sp1Sp2                 | 18 (10) | 9 (13)  | 10 (13)  | 6 (7)                  | Sp1Sp2   | 13 (9)  | 6 (11)   | 6 (12)  | 4 (10)  |
|                               | Sp1Stu2                | 18 (12) | 16 (14) | 7 (15)   | 8 (8)                  | Sp1Stu2  | 17 (11) | 15 (13)  | 14 (14) | 10 (11) |
|                               | Sp2Stu1                | 10 (9)  | 8 (11)  | 17 (12)  | 4 (7)                  | Sp2Stu1  | 8 (8)   | 9 (10)   | 14 (11) | 12 (9)  |
|                               | Stu1Stu2               | 0 (14)  | 22 (17) | 22 (17)  | 14 (10)                | Stu1Stu2 | 3 (13)  | 19 (15)  | 20 (17) | 18 (14) |
| <b>AL1, LAS (80 cM)</b>       | Sp1Sp2                 | 7 (5)   | 7 (6)   | 8 (7)    | 0 (4)                  | Sp1Sp2   | 10 (5)  | 5 (6)    | 3 (6)   | 0 (5)   |
|                               | Sp1Stu2                | 17 (11) | 6 (14)  | 19 (14)  | 5 (8)                  | Sp1Stu2  | 11 (10) | 10 (12)  | 16 (13) | 6 (11)  |
|                               | Sp2Stu1                | 10 (12) | 19 (14) | 10 (15)  | 10 (8)                 | Sp2Stu1  | 8 (11)  | 11 (13)  | 10 (14) | 9 (11)  |
|                               | Stu1Stu2               | 12 (17) | 23 (21) | 19 (21)  | 17 (12)                | Stu1Stu2 | 12 (15) | 23 (18)  | 25 (20) | 29 (17) |
