# Supplementary material
Source: PubMed Central journal article supplement (PMC3697974)
Supplement: 94fec7a708d97532258d928aa49f4533_genetics.113.152561-5.pdf [file 94fec7a708d97532258d928aa49f4533_genetics.113.152561-5.pdf]

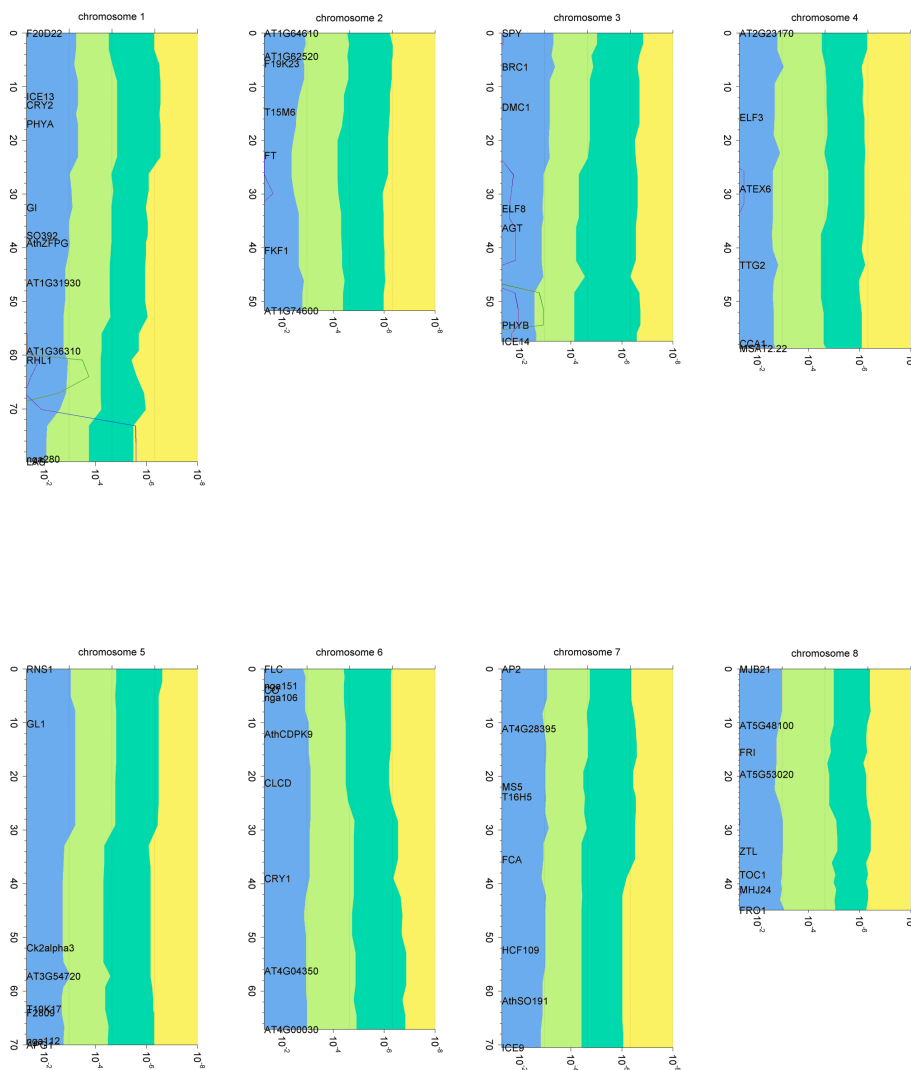

**Figure S6** Single-locus TRD analyses for  $SpStuF_2$ . The  $p$ -value of the likelihood ratio tests are on the horizontal axes and genetic distances in cM on the y-axis. The blue line indicates gametic vs. null, and the green line indicates zygotic vs. null. The frequencies of the four  $F_2$  genotypes are shown in different colours; from left to right: Sp homozygote (Sp1Sp2, blue), Sp1Stu2, Stu1Sp2 and Stu homozygote (Stu1Stu2, yellow).
