# Supplementary material
Source: PubMed Central journal article supplement (PMC3697974)
Supplement: 299538fcebb940481c99b8a03cc94faa_genetics.113.152561-14.pdf [file 299538fcebb940481c99b8a03cc94faa_genetics.113.152561-14.pdf]

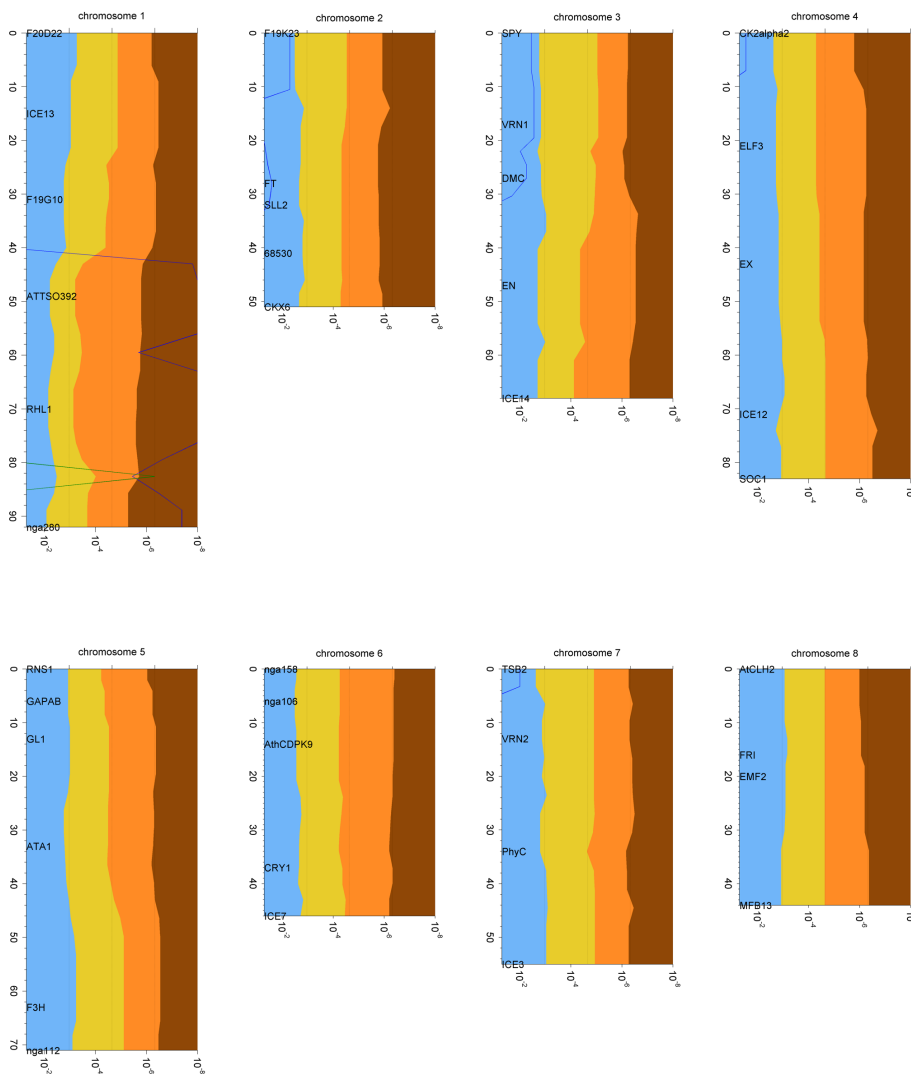

**Figure S5** Single-locus TRD analyses for SpPI3F<sub>2</sub>. The  $p$ -value of the likelihood ratio tests are on the horizontal axes and genetic distances in cM on the y-axis. The blue line indicates gametic vs. null, and the green line indicates zygotic vs. null. The frequencies of the four F<sub>2</sub> genotypes are shown in different colours; from left to right: Sp homozygote (Sp1Sp2, blue), Sp1PI2, PI1Sp2 and PI homozygote (PI1PI2, brown).
