# Supplementary material
Source: PubMed Central journal article supplement (PMC3697974)
Supplement: e89f13fbbfedb2a4914f2ca4d620d55d_genetics.113.152561-10.pdf [file e89f13fbbfedb2a4914f2ca4d620d55d_genetics.113.152561-10.pdf]

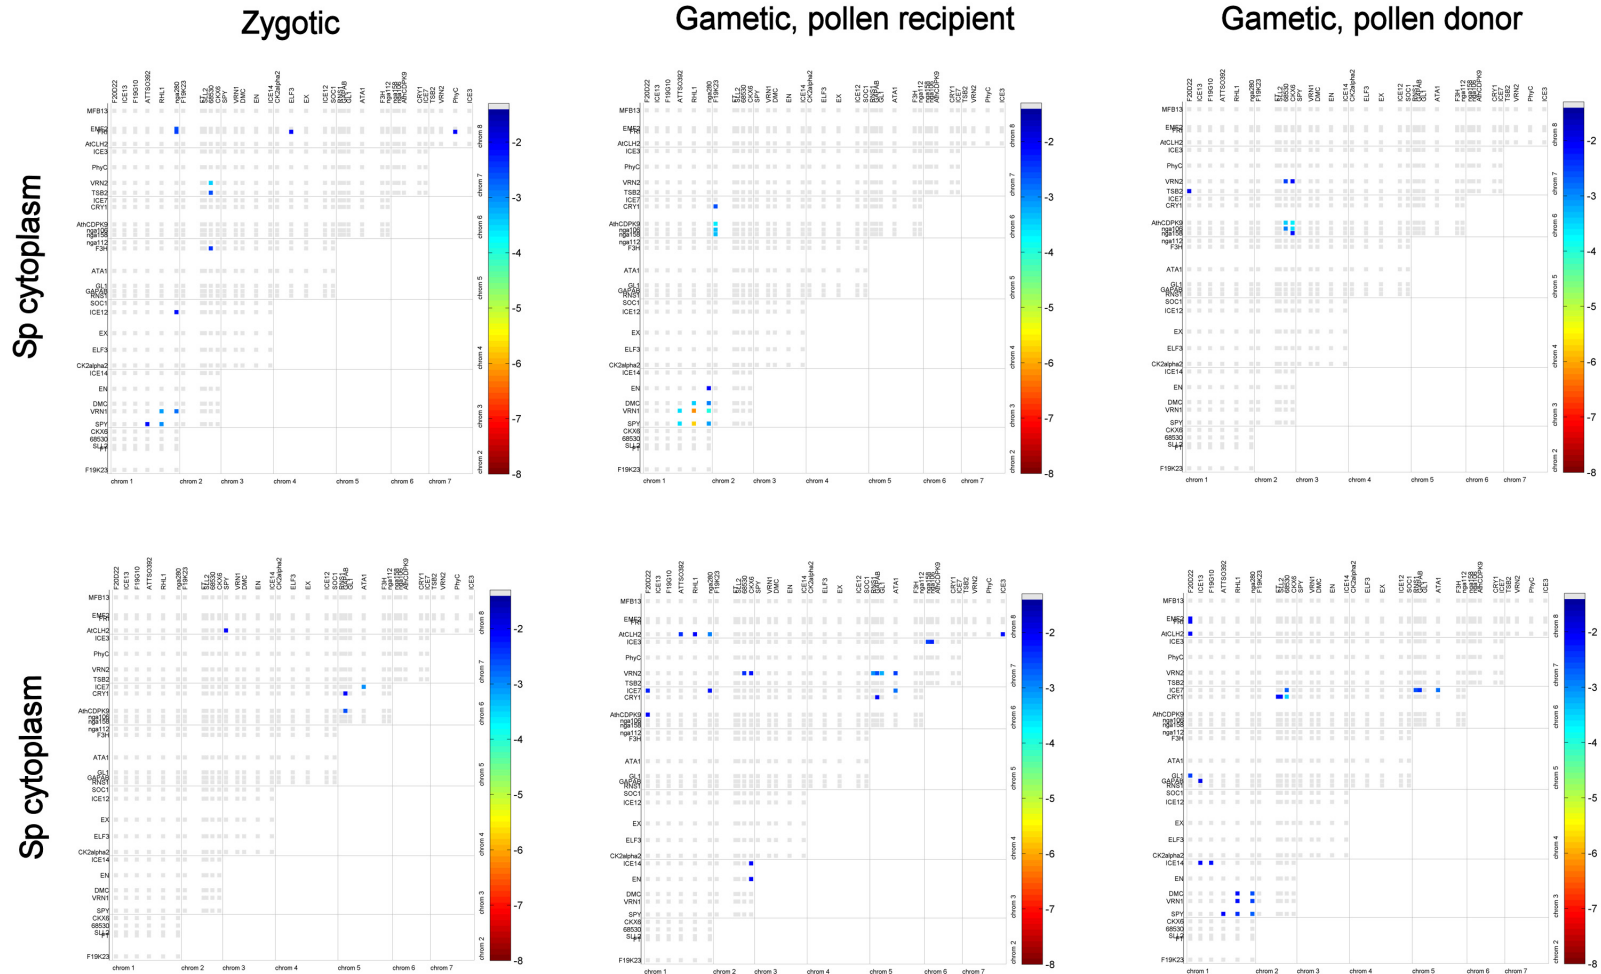

**Figure S9** Two-locus TRD analyses for Sp x Pl reciprocal crosses. In each plot the molecular markers are indicated on horizontal axis starting from AL1 to AL8 from left to right. Similarly in vertical axis the marker order runs from AL1 to AL8 from down to up. The colours indicate  $p$ -values (between 0.01 -  $1 \times 10^{-8}$ ) from two-locus  $\chi^2$  tests. Any  $p > 0.01$  is shown in grey.
